# Supplementary material
Source: PubMed Central journal article supplement (PMC3980468)
Supplement: NIHMS561511-supplement-Supplementary.pdf [file NIHMS561511-supplement-Supplementary.pdf]

# Multicomponent Chemical Imaging of Pharmaceutical Solid Dosage Forms with Broadband CARS Microscopy

*Christopher M. Hartshorn<sup>1</sup>, Young Jong Lee<sup>1</sup>, Charles H. Camp Jr.<sup>1</sup>, Zhen Liu<sup>3</sup>, John  
Heddleston<sup>1</sup>, Nicole Canfield<sup>2</sup>, Timothy A. Rhodes<sup>2</sup>, Angela R. Hight Walker<sup>1</sup>, Patrick J. Marsac<sup>3</sup>  
and Marcus T. Cicerone<sup>1\*</sup>*

<sup>1</sup>Materials Measurement Laboratory, National Institute of Standards and Technology,  
Gaithersburg, Maryland, 20899 United States

<sup>2</sup>Merck, Analytical Sciences, Rahway, New Jersey, 07065 United States

<sup>3</sup>Merck, Molecular & Materials Characterization, West Point, Pennsylvania, 19486 United States

## Abstract for Supporting Information

The supplementary material presented here (Figures S-1 to S-4) represents the analysis of the active pharmaceutical ingredient used in this work, indomethacin, prior to being tableted. Also, the final figure S-5 represents the analysis of a single particle of the gamma polymorph after tableting of the solid dosage form. The purpose of including this data is to verify the initial purity of the API polymorphs and to substantiate claims made within the primary manuscript with respect to the crystalline API's impurity discovered by BCARS in the solid dosage form.

## SUPPORTING FIGURES

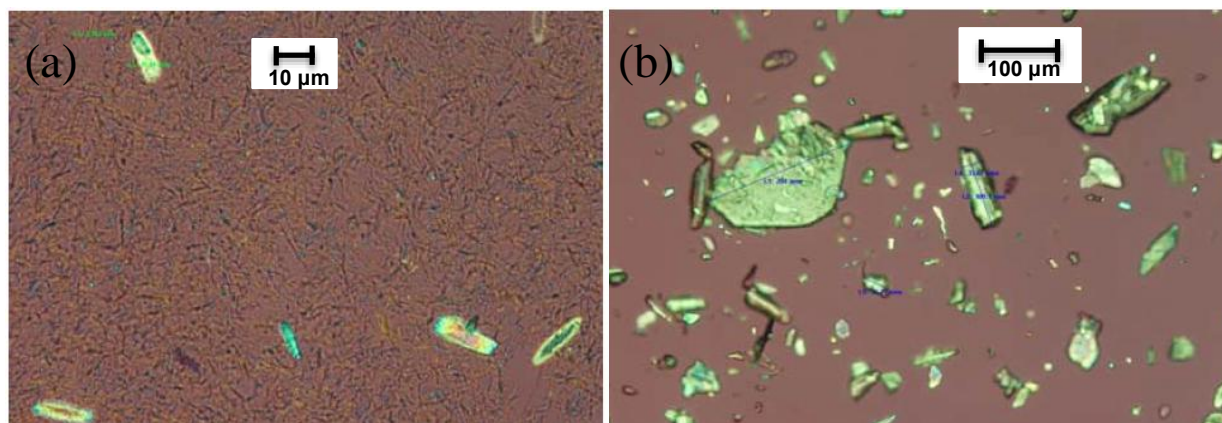

**Figure S-1.** Optical micrographs of  $\alpha$ -indomethacin (a) and  $\gamma$ -indomethacin (b) crystals before tableting on filter paper ( $\alpha$ -IMC) and in Petri dish ( $\gamma$ -IMC), respectively.

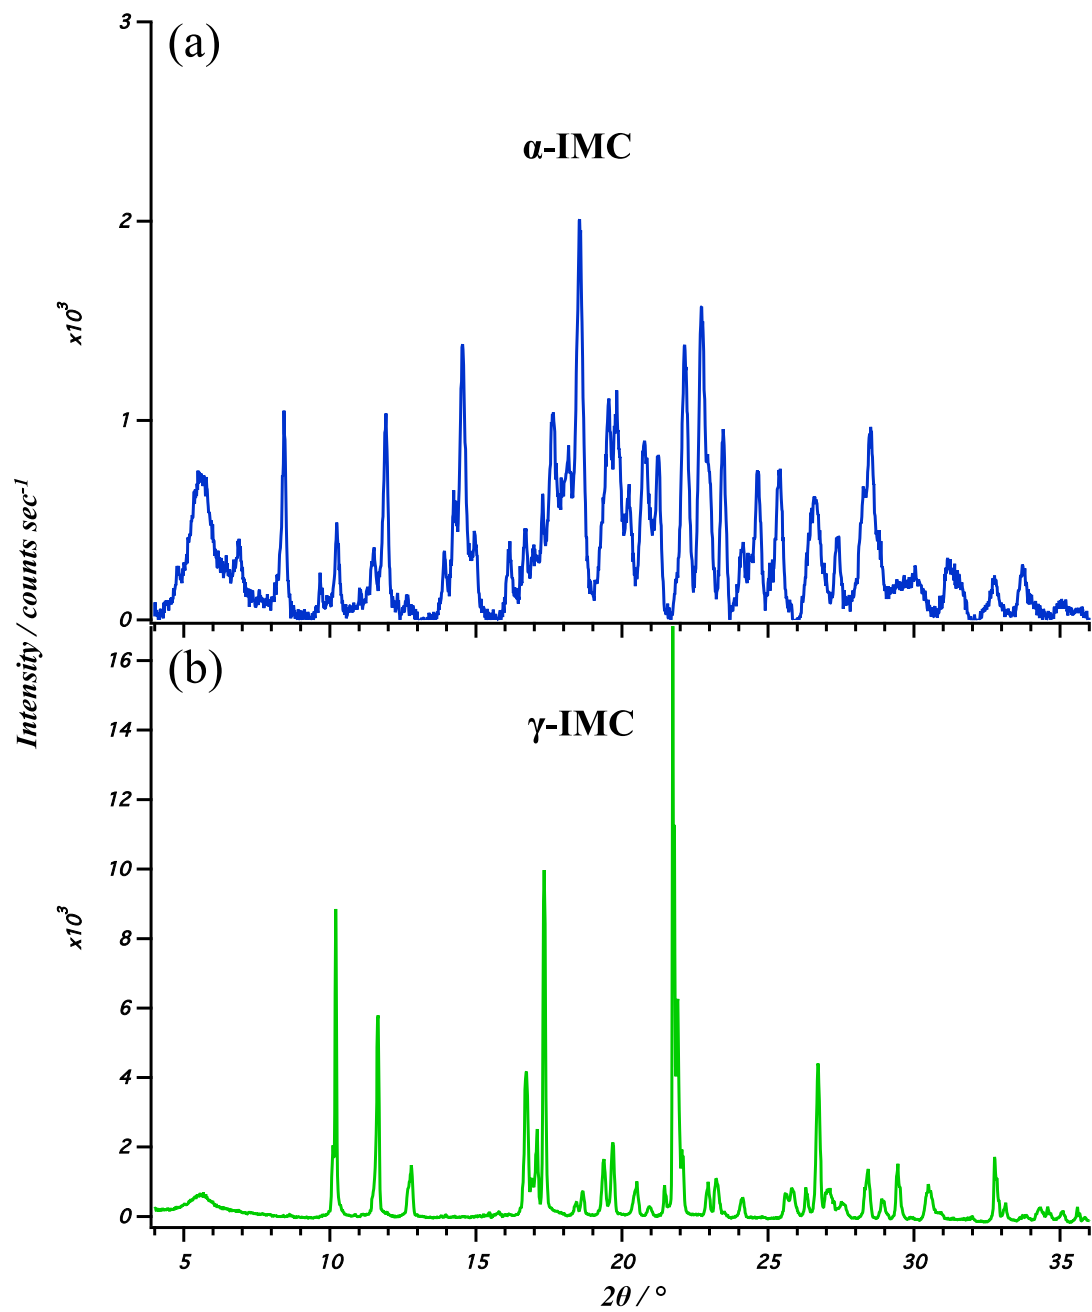

**Figure S-2.** X-ray diffraction patterns of  $\alpha$ -indomethacin (a) and  $\gamma$ -indomethacin (b)

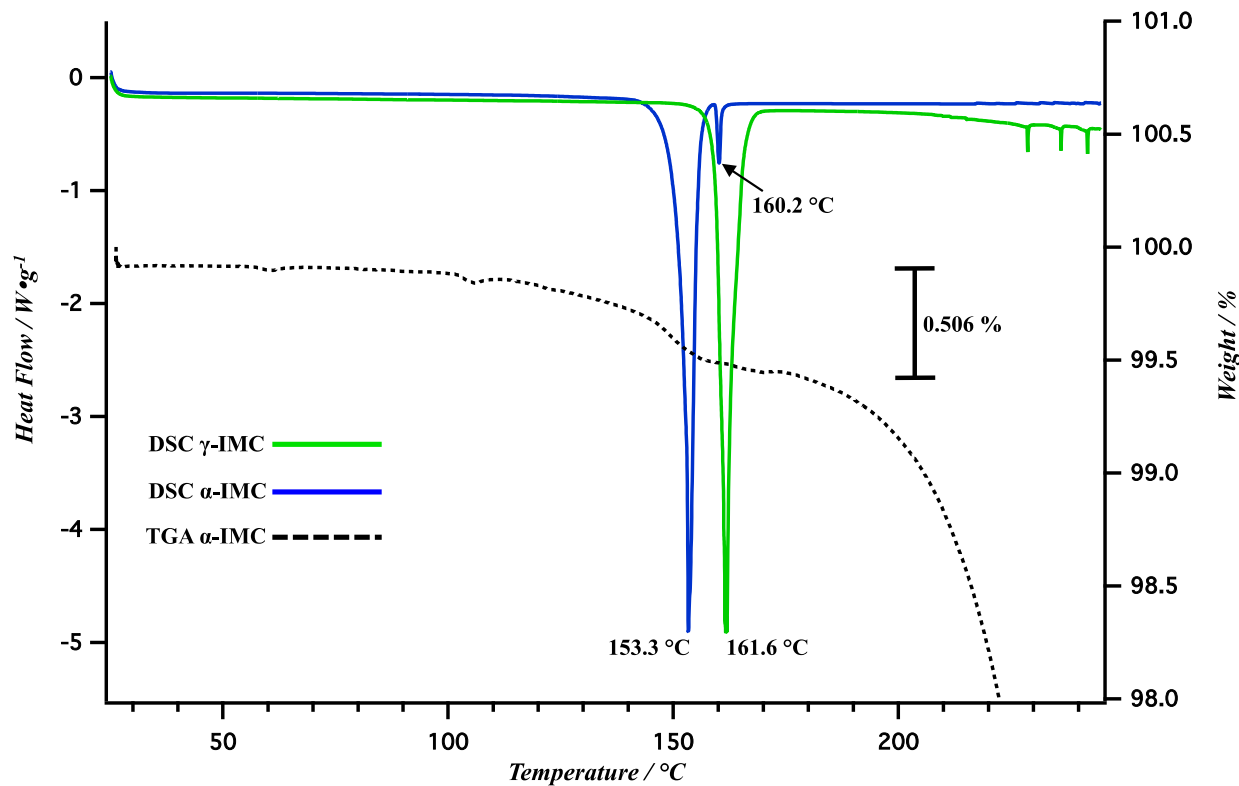

**Figure S-3.** Thermograms of  $\alpha$ -indomethacin (solid blue) and  $\gamma$ -indomethacin (solid green) versus heat flow (left axis). Thermogravimetric data of  $\alpha$ -indomethacin (dashed black) prepared with EtOH / H<sub>2</sub>O crash, displaying a  $\sim 0.5\%$  loss at its melting point from volatiles trapped in solid crystal.

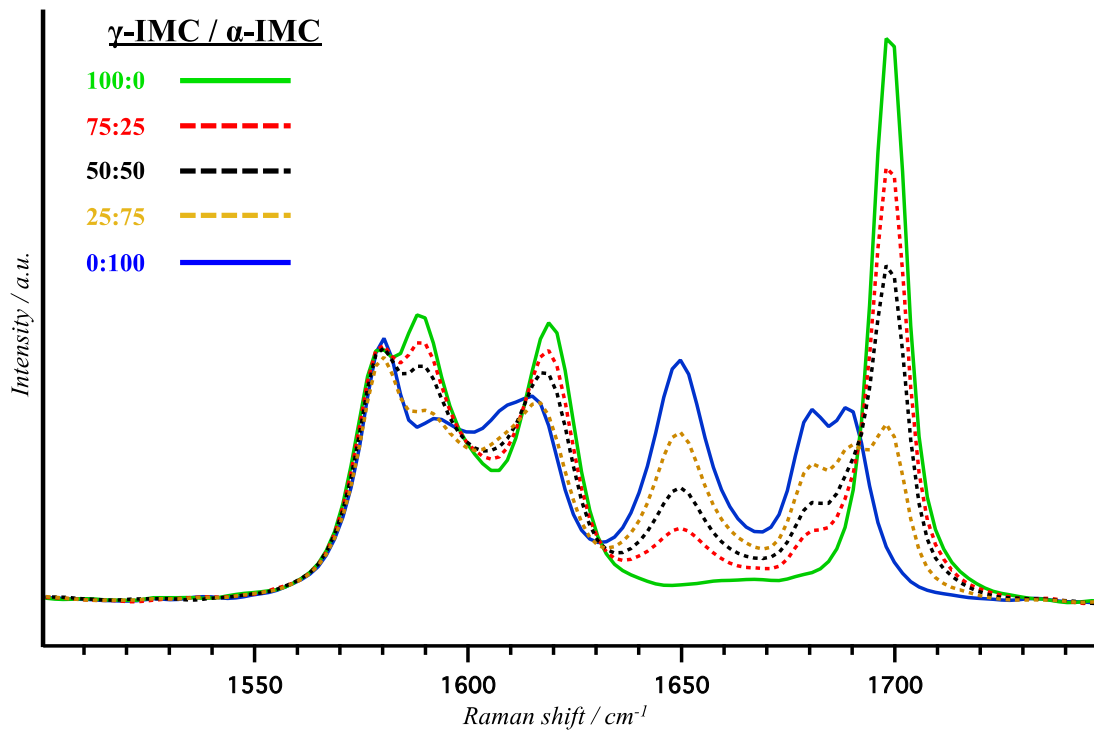

**Figure S-4.** Spontaneous Raman spectra of 100 %  $\gamma$ -IMC (solid green), 75:25  $\gamma/\alpha$ -IMC (dashed red), 50:50  $\gamma/\alpha$ -IMC (dashed black), 25:75  $\gamma/\alpha$ -IMC (dashed yellow) and 100 %  $\alpha$ -IMC (solid blue) tablet surface between 1500-1800  $\text{cm}^{-1}$  from while being rotated at 100 RPM for 10 minutes each.

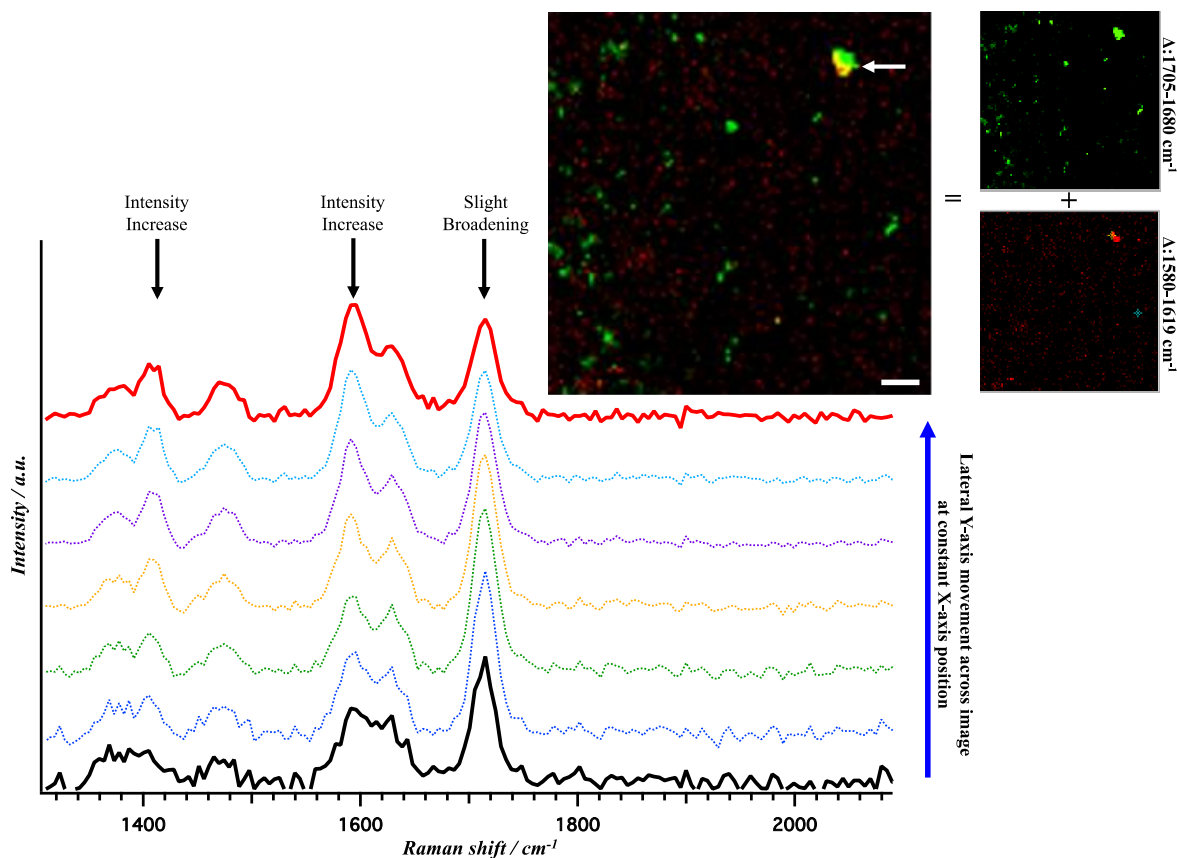

**Figure S-5.** BCARS spectra of 100 %  $\gamma$ -IMC cryoground tablet surface from separate pixels from the large inset 100 x 100 pixel image from right to left (black to red spectra) beginning at the tip of the white arrow. Images to the right of the large inset image are contrasted to the two spectral signatures and combined are what account for the pseudocolored image to their left.
